# Supplementary material
Source: PubMed Central journal article supplement (PMC10038678)
Supplement: mmc1.pdf [file mmc1.pdf]

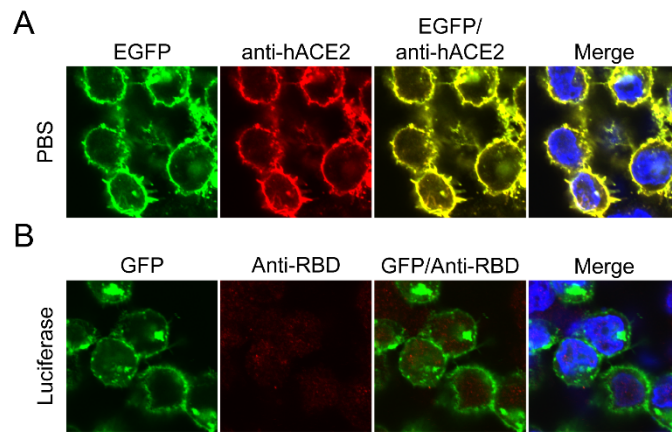

Figure S1. **(A)** The human ACE2 was co-expressed with EGFP in HEK-293T cells. **(B)** Baculovirus and other proteins in silkworm did not bind with hACE2.

A

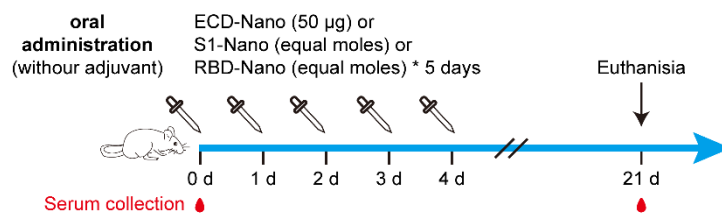

B

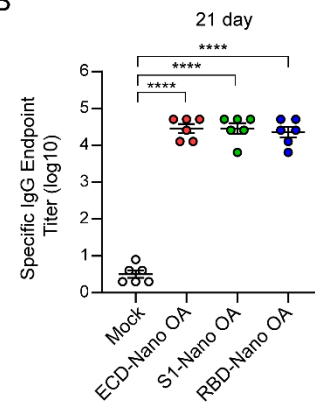

Figure S2. Safety assay of nanoparticle vaccines in mice via oral administration with high-dose. (A) The immunization protocols. (B) Detection of the specific IgG of sera of the oral immunized mice. The GMTs of ECD specific IgG in ECD-Nano immunized mice and S1 specific IgG in S1-Nano immunized mice were 28,707. The GMT of RBD specific IgG in RBD-Nano immunized mice was 22,803. Error bar, SEM; \*\*\*\* $P < 0.0001$ .

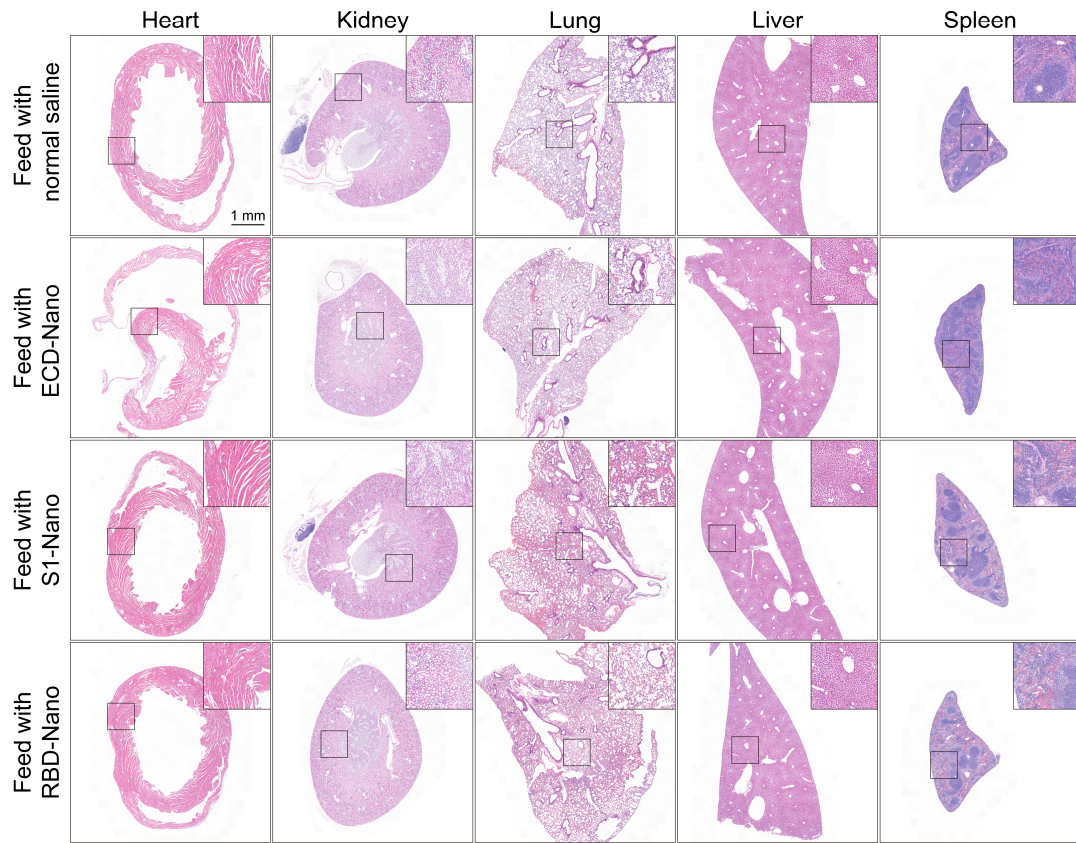

Figure S3. H&E staining of main organs (heart, kidney, lung, liver and spleen) of the mice treated with different nanoparticle antigens orally.

**Table S1. Detection of neutralizing activity in sera of mice after immunization.**

| Serum of Mice Injected with | SARS-CoV-2 Virus strain | Dilution Gradient |      |      |       |       | Neutralization Titer |
|-----------------------------|-------------------------|-------------------|------|------|-------|-------|----------------------|
|                             |                         | 1:20              | 1:40 | 1:80 | 1:160 | 1:320 |                      |
| ECD-Nano                    |                         | -                 | -    | -    | -     | +     | 1:160                |
|                             |                         | -                 | -    | -    | +     | +     |                      |
| S1-Nano                     | Origin strain           | -                 | -    | +    | +     | +     | 1:80                 |
|                             |                         | -                 | -    | -    | +     | +     |                      |
| RBD-Nano                    |                         | -                 | +    | +    | +     | +     | 1:30                 |
|                             |                         | -                 | +    | +    | +     | +     |                      |

  

|          |                | Dilution Gradient |     |      |      |      | Neutralization Titer |
|----------|----------------|-------------------|-----|------|------|------|----------------------|
|          |                | 1:4               | 1:8 | 1:16 | 1:32 | 1:64 |                      |
| ECD-Nano |                | -                 | -   | -    | -    | +    | 1:48                 |
|          |                | -                 | -   | -    | -    | +    |                      |
| S1-Nano  | Delta variants | -                 | -   | -    | +    | +    | 1:32                 |
|          |                | -                 | -   | -    | -    | +    |                      |
| RBD-Nano |                | +                 | +   | +    | +    | +    | <1:2                 |
|          |                | +                 | +   | +    | +    | +    |                      |

Method of neutralization test: microneutralization test, cytopathic effect (CPE) observation three days after cell infection.

-: No CPE.

+: Significant CPE.
